# Supplementary material for: Cause of death in patients with poststroke epilepsy: Results from a nationwide cohort study
Source: PubMed Central journal article supplement (PMC5381780; doi:10.1371/journal.pone.0174659), 2017-04-05
Supplement: pone.0174659.s002.pdf [file pone.0174659.s002.pdf]

**Table S2. Underlying causes of death per age group at time of death.**

| <b>Age</b>                                                    | <b>0-19</b> |           | <b>20-39</b> |             | <b>40-59</b> |             | <b>60-79</b> |             | <b>80-99</b> |             | <b>100+</b> |             |
|---------------------------------------------------------------|-------------|-----------|--------------|-------------|--------------|-------------|--------------|-------------|--------------|-------------|-------------|-------------|
| <b>Chapter</b>                                                | <b>n</b>    | <b>%</b>  | <b>n</b>     | <b>%</b>    | <b>n</b>     | <b>%</b>    | <b>n</b>     | <b>%</b>    | <b>n</b>     | <b>%</b>    | <b>n</b>    | <b>%</b>    |
| Certain infectious and parasitic diseases                     | 0           | 0%        | 0            | 0%          | 3            | 3.1%        | 40           | 3.0%        | 69           | 2.7%        | 4           | 2.0%        |
| Neoplasms                                                     | 0           | 0%        | 1            | 25%         | 34           | 34.7%       | 259          | 19.2%       | 187          | 7.4%        | 24          | 12.2%       |
| Diseases of the blood and blood-forming                       | 0           | 0%        | 0            | 0%          | 0            | 0%          | 0            | 0.0%        | 4            | 0.2%        | 0           | 0%          |
| Endocrine, nutritional and metabolic diseases                 | 0           | 0%        | 0            | 0%          | 10           | 10.2%       | 54           | 4%          | 64           | 2.5%        | 13          | 6.6%        |
| Mental and behavioral disorders                               | 0           | 0%        | 0            | 0%          | 1            | 1%          | 44           | 3.3%        | 185          | 7.4%        | 8           | 4.1%        |
| Diseases of the nervous system                                | 0           | 0%        | 0            | 0%          | 4            | 4.1%        | 41           | 3%          | 69           | 2.7%        | 9           | 4.6%        |
| Diseases of the circulatory system                            | 0           | 0%        | 2            | 50%         | 30           | 30.6%       | 734          | 54.3%       | 1637         | 65.0%       | 114         | 58.2%       |
| Diseases of the respiratory system                            | 0           | 0%        | 0            | 0%          | 2            | 2%          | 68           | 5.0%        | 112          | 4.4%        | 8           | 4.1%        |
| Diseases of the digestive system                              | 0           | 0%        | 1            | 25%         | 3            | 3.1%        | 28           | 2.1%        | 39           | 1.5%        | 1           | 0.5%        |
| Diseases of the skin and subcutaneous tissue                  | 0           | 0%        | 0            | 0%          | 0            | 0%          | 0            | 0%          | 2            | 0.1%        | 0           | 0%          |
| Diseases of the musculoskeletal system                        | 0           | 0%        | 0            | 0%          | 0            | 0%          | 10           | 0.7%        | 4            | 0.2%        | 0           | 0%          |
| Diseases of the genitourinary system                          | 0           | 0%        | 0            | 0%          | 0            | 0%          | 15           | 1.1%        | 16           | 0.6%        | 3           | 1.5%        |
| Congenital malformations , deformations and chromosomal abn   | 0           | 0%        | 0            | 0%          | 0            | 0%          | 5            | 0.4%        | 0            | 0%          | 0           | 0%          |
| Symptoms, signs and abnormal clinical and laboratory findings | 0           | 0%        | 0            | 0%          | 7            | 7.1%        | 23           | 1.7%        | 60           | 2.4%        | 9           | 4.6%        |
| External causes of morbidity and mortality                    | 0           | 0%        | 0            | 0%          | 4            | 4.1%        | 31           | 2.3%        | 69           | 2.7%        | 3           | 1.5%        |
| <b>Total</b>                                                  | <b>0</b>    | <b>0%</b> | <b>4</b>     | <b>100%</b> | <b>98</b>    | <b>100%</b> | <b>1352</b>  | <b>100%</b> | <b>2517</b>  | <b>100%</b> | <b>196</b>  | <b>100%</b> |
