# Supplementary material for: Cause of death in patients with poststroke epilepsy: Results from a nationwide cohort study
Source: PLoS One. 2017 Apr 5;12(4):e0174659. doi: 10.1371/journal.pone.0174659 (PMC5381780; doi:10.1371/journal.pone.0174659)
Supplement: S1 Table — (PDF) [file pone.0174659.s001.pdf]

**Table S1. Causes of death and proportionate mortality rate in all patients**

| Patients with poststroke epilepsy                            |      | (deaths = 4167)   |
|--------------------------------------------------------------|------|-------------------|
| ICD-10 Chapter (abbreviated titles)                          | n    | PMR (95%CI)       |
| Diseases of the circulatory system                           | 2517 | 60.4% (58.9-61.9) |
| Neoplasms                                                    | 505  | 12.1% (11.2-13.2) |
| Mental disorders                                             | 238  | 5.7% (5.1-6.5)    |
| Diseases of the respiratory system                           | 190  | 4.6% (4.0-5.2)    |
| Endocrine, nutritional and metabolic diseases                | 141  | 3.4% (2.9-4.0)    |
| Diseases of the nervous system                               | 123  | 3.0% (2.5-3.5)    |
| Infections and parasitic diseases                            | 116  | 2.8% (2.3-3.3)    |
| External causes                                              | 107  | 2.6% (2.1-3.1)    |
| Symptoms, signs and laboratory findings                      | 99   | 2.4% (2.0-2.9)    |
| Diseases of the digestive system                             | 72   | 1.7% (1.4-2.2)    |
| Diseases of the genitourinary system                         | 34   | 0.8% (0.6-1.1)    |
| Diseases of the musculoskeletal system and connective tissue | 14   | 0.3% (0.2-0.6)    |
| Congenital malformations, chromosomal abnormalities          | 5    | 0.1%              |
| Diseases of the blood and blood forming organs               | 4    | 0.1%              |
| Diseases of the skin                                         | 2    | 0.0%              |
| Pregnancy, childbirth, and puerperium                        | 0    | 0.0%              |
