# Supplementary material for: Cause of death in patients with poststroke epilepsy: Results from a nationwide cohort study
Source: PLOS journal article supplement (doi:10.1371/journal.pone.0174659), 2017-04-05
Supplement: S3 (10.1371/journal.pone.0174659.s003) [file journal.pone.0174659.s003]

**Table S3 Death from suicide, drowning and transport accidents in patients with PSE.**

|                               | Poststroke epilepsy<br>(4167 deaths) |      |
|-------------------------------|--------------------------------------|------|
|                               | n                                    | %    |
| Drowning (V90, V92 and T75.1) | 0                                    | 0%   |
| Transport accidents (V01-V99) | 2                                    | 0%   |
| Self harm/suicide (X60-X84)   | 8                                    | 0.2% |
